# Supplementary material for: Spectroscopic and Electrochemical Studies of Imogolite and Fe-Modified Imogolite Nanotubes
Source: MDPI journal article supplement (doi:10.3390/nano6020028), 2016-02-02

# Supplementary Materials: Spectroscopic and Electrochemical Studies of Imogolite and Fe-Modified Imogolite Nanotubes

Carmen Castro <sup>1</sup>, Nicolas Arancibia-Miranda <sup>1,2</sup>, Cristina Acuña-Rougier <sup>1</sup>, Mauricio Escudéy <sup>1,2</sup> and Federico Tasca <sup>1,\*</sup>

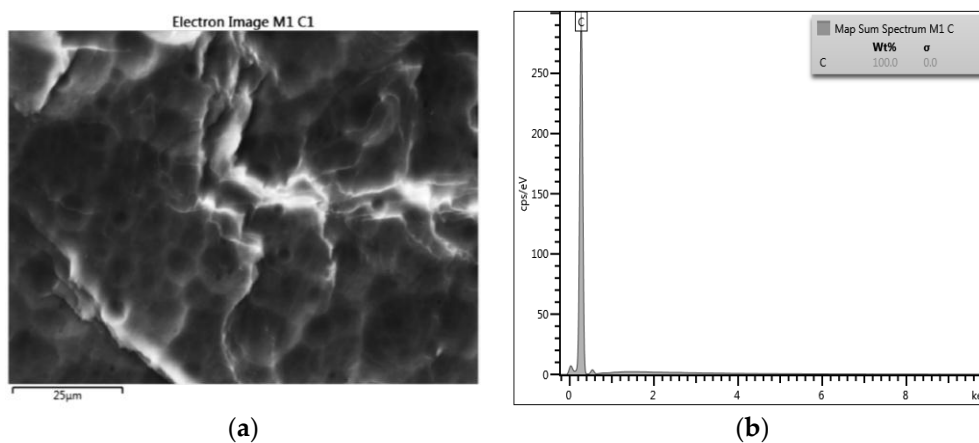

**Figure S1.** (a) Scanning electron microscopy (SEM) image and (b) energy-dispersive X-ray spectroscopy (EDX) spectrum of the graphite electrodes (GE) basal plane.

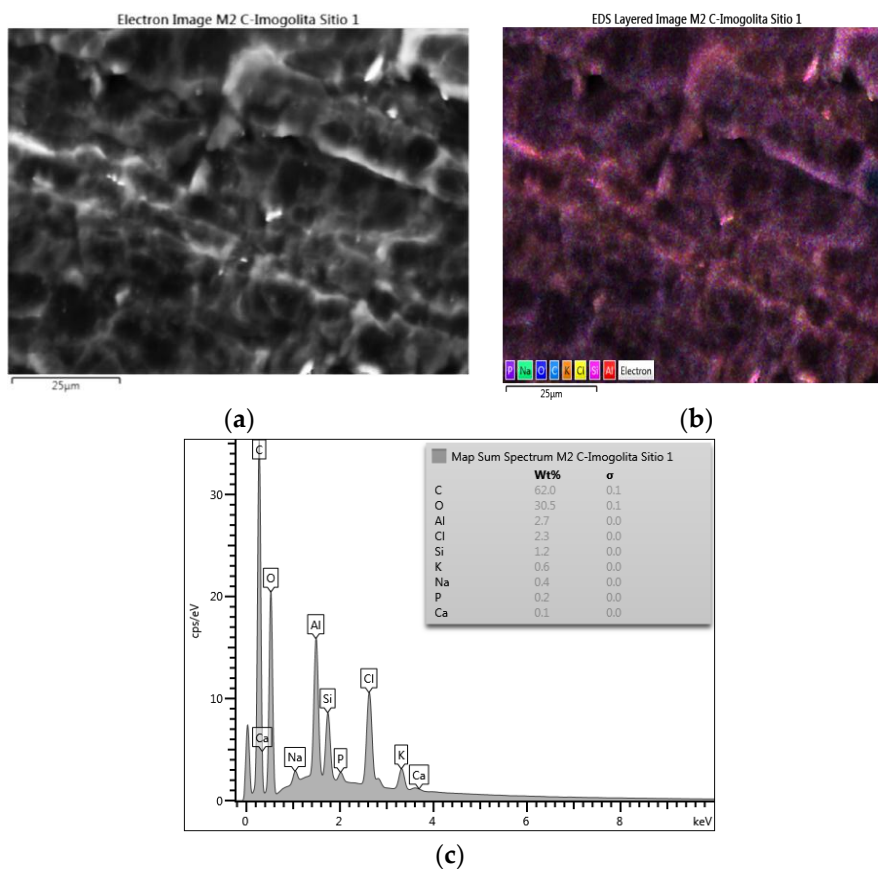

**Figure S2.** (a) SEM image, (b) layered energy dispersed spectroscopy (EDS) and (c) EDX spectrum of GE modified with Im.

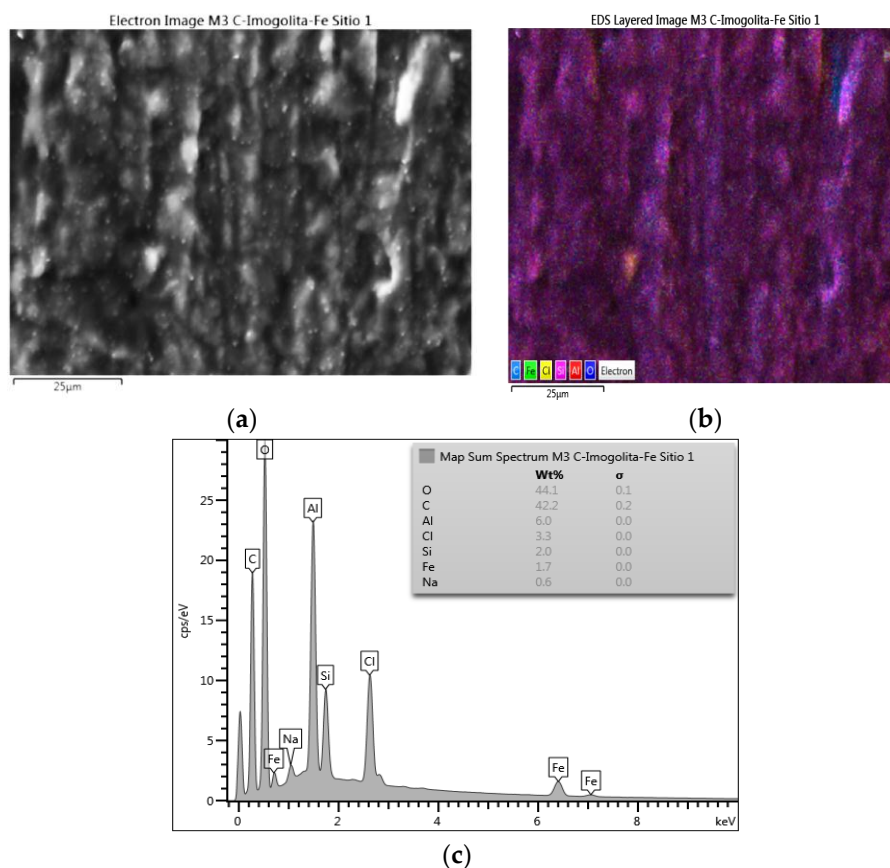

**Figure S3.** (a) SEM image, (b) layered EDS and (c) EDX spectrum of GE modified with Im(Fe).

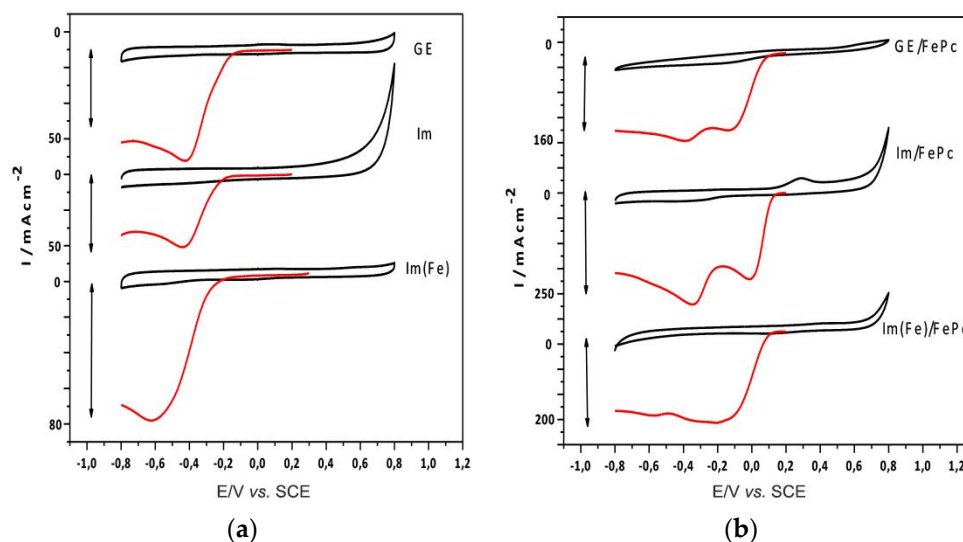

**Figure S4.** (a) Cyclic voltammetry and polarization curves for the oxygen reduction reaction (ORR) ( $O_2$  saturated conditions, red line) of the GE and GE modified with Im and with Im(Fe); (b) cyclic voltammetry and polarization curves ( $O_2$  saturated conditions, red line) of the GE modified with FePc, Im/FePc and Im(Fe)/FePc.

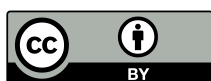

Supplement: s1 [file s1]
